# Supplementary material for: Dietary Animal Plasma Proteins Improve the Intestinal Immune Response in Senescent Mice
Source: MDPI journal article supplement (doi:10.3390/nu9121346), 2017-12-11
Supplement: s1 [file s1]

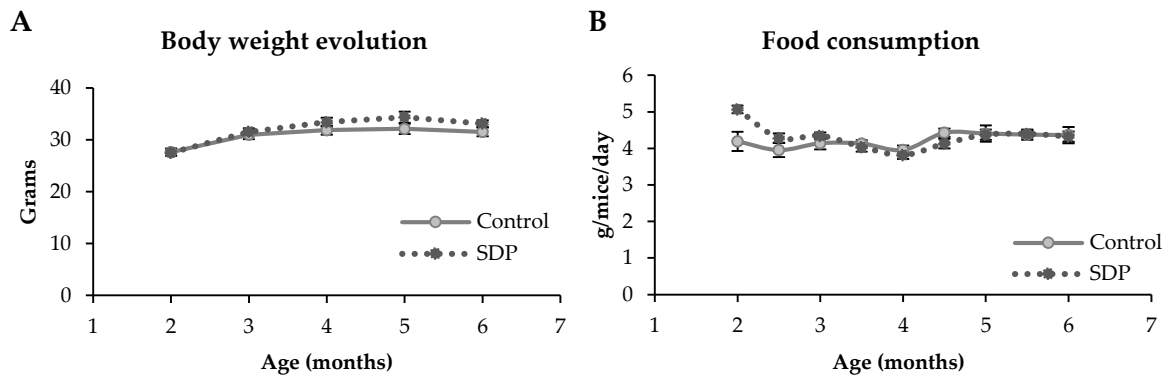

Figure S1. Body weight evolution (A) and food consumption (B) of SAMP8. The body weight of SAMP8 mice has been measured once a month. Food intake has been measured three times per week during the feeding period. Results are expressed as mean  $\pm$  SEM (n=6-8 mice).
